# Supplementary material for: Staphylococcus aureus Exploits a Non-ribosomal Cyclic Dipeptide to Modulate Survival within Epithelial Cells and Phagocytes
Source: PubMed Central journal article supplement (PMC5025175; doi:10.1371/journal.ppat.1005857), 2016-09-15
Supplement: ppat.1005857.s011.pdf [file ppat.1005857.s011.pdf]

S1 Table : Bacterial Strains used in this study

| Strain                        | Description                                                                                                                                                                                                 | Source              |
|-------------------------------|-------------------------------------------------------------------------------------------------------------------------------------------------------------------------------------------------------------|---------------------|
| <i>Escherichia coli</i>       |                                                                                                                                                                                                             |                     |
| DH5 $\alpha$                  | <i>fhuA2 lac(del)U169 phoA glnV44 <math>\Phi</math>80' lacZ(del)M15 gyrA96 recA1 relA1 endA1 thi-1 hsdR17</i>                                                                                               | BRL Life Technology |
| <i>Staphylococcus aureus</i>  |                                                                                                                                                                                                             |                     |
| RN4220                        | NCTC 8325-4 <i>sau1<sup>-</sup>, hsdR<sup>-</sup></i> , laboratory strain accepting foreign DNA; $\beta$ -toxin producer, no $\beta$ -hemolysis                                                             | [48]                |
| RN4220 p0182                  | RN4220 with complementation plasmid p0182                                                                                                                                                                   | This study          |
| 6850                          | methicillin-sensitive; <i>spa</i> type t185, sequence type 50 [38], Isolated from a patient with a skin abscess, progressed to bacteremia, osteomyelitis, septic arthritis, and multiple systemic abscesses | [57]                |
| LAC                           | USA300 CA-MRSA, staphylococcal chromosomal cassette <i>mec</i> (SCC <i>mec</i> ) type IV, <i>spa</i> -type 1, Sequence type 8 [ST8].                                                                        | [53]                |
| LAC $\Delta\alpha\beta\delta$ | LAC with deletions of the <i>psm</i> $\alpha$ and <i>psm</i> $\beta$ operons, as well as a point mutation in the initiation codon of $\delta$ -toxin                                                        | [54]                |
| JE2                           | USA300, <i>rsp<sup>+</sup></i> . Derivative of LAC, which was cured of three plasmids.                                                                                                                      | [18]                |
| JE2 NE119 ( <i>ausA</i> )     | JE2 <i>ausA::bursa</i> , deficient in aureusimine production                                                                                                                                                | [18]                |
| JE2 NE964 ( <i>ausB</i> )     | JE2 <i>ausB::bursa</i> , deficient in aureusimine production                                                                                                                                                | [18]                |
| JE2 NE1908 ( <i>pmtC</i> )    | JE2 <i>pmtC::bursa</i> , mutant in the phenol-soluble modulins transporter component, <i>pmtC</i>                                                                                                           | [18]                |
| JE2 NE1532 ( <i>agrA</i> )    | JE2 <i>agrA::bursa</i> , non-hemolytic insertional mutant in the quorum sensing system <i>agr</i>                                                                                                           | [18]                |
| NE964 p0182                   | NE964 carrying plasmid p0182, aureusimine producer                                                                                                                                                          | This study          |
