# Supplementary material for: Staphylococcus aureus Exploits a Non-ribosomal Cyclic Dipeptide to Modulate Survival within Epithelial Cells and Phagocytes
Source: PubMed Central journal article supplement (PMC5025175; doi:10.1371/journal.ppat.1005857), 2016-09-15
Supplement: ppat.1005857.s012.pdf [file ppat.1005857.s012.pdf]

*S2 Table: Plasmids used in the study*

| <b>Name</b> | <b>Description</b>                  | <b>Source</b> |
|-------------|-------------------------------------|---------------|
| pBTn        | plasmid for transposon mutagenesis  | [58]          |
| p0182       | <i>ausB</i> complementation plasmid | This study    |
