# Supplementary material for: Staphylococcus aureus Exploits a Non-ribosomal Cyclic Dipeptide to Modulate Survival within Epithelial Cells and Phagocytes
Source: PubMed Central journal article supplement (PMC5025175; doi:10.1371/journal.ppat.1005857), 2016-09-15
Supplement: ppat.1005857.s013.pdf [file ppat.1005857.s013.pdf]

S3 Table: PCR and Adaptor Oligonucleotides

| Name                              | Sequence (5'-3')                                                               |
|-----------------------------------|--------------------------------------------------------------------------------|
| <b>TIS Sequencing</b>             |                                                                                |
| MultiPlex-Y-Adapt_r               | ACACTCTTCCCTACACGACGCTCTTCCGATC*T                                              |
| MultiPlex-Y-Adapt_f               | [Phos]GATCGGAAGAGCACACGTCT                                                     |
| Himar_TnSeq_Reader1_v2            | ACCGAGATCTACGGACTTATCAGCCAACCTGT                                               |
| MP-TnSeq_Index2 (barcode CGATGT)  | CAAGCAGAAGACGGCATAACGAGAT <u>ACATCGGTGACTGGAGTTCAGACG</u><br>TGTGCTCTTCCGATCT  |
| MP-TnSeq_Index7 (barcode CAGATC)  | CAAGCAGAAGACGGCATAACGAGAT <u>GATCTGGT</u> GACTGGAGTTCAGACG<br>TGTGCTCTTCCGATCT |
| MP-TnSeq_Index8 (barcode ACTTGA)  | CAAGCAGAAGACGGCATAACGAGAT <u>CAAGTGT</u> GACTGGAGTTCAGACG<br>TGTGCTCTTCCGATCT  |
| MP-TnSeq_Index9 (barcode GATCAG)  | CAAGCAGAAGACGGCATAACGAGAT <u>CTGATCGT</u> GACTGGAGTTCAGACG<br>TGTGCTCTTCCGATCT |
| MP-TnSeq_Index10 (barcode TAGCTT) | CAAGCAGAAGACGGCATAACGAGAT <u>AAGCTAGT</u> GACTGGAGTTCAGACG<br>TGTGCTCTTCCGATCT |
| TnSeq-HimarPCR_v2-PT              | GACCACCGAGATCTACGAGACCGGGGACTTATCAGC                                           |
| himar-5-PCR                       | CCATAACTTTAGGGTTAACCATACGC                                                     |
| himar-3-PCR                       | CAGCTTCCAAGGAGCTAAAGAGGTCC                                                     |
| IS-Himar-forward                  | AATGATACGGCGACCACCGAGATCT                                                      |
| IS-BC-Reverse                     | CAAGCAGAAGACGGCATAACGAGAT                                                      |
| <b>RT-PCR</b>                     |                                                                                |
| RT- <i>gyrB</i> -R                | ATAGCCTGCTTCAATTAACG                                                           |
| RT- <i>gyrB</i> -F                | CGACTTTGATCTAGCGAAAG                                                           |
| 0181_for_RT                       | GTGTCCATTTTCGATGATAGTC                                                         |
| 0181_rev_RT                       | TGTCAGAGTTATTCTCTAACCG                                                         |
| 0182_for_RT                       | AACCGCGTACAGTCAACTATAG                                                         |
| 0182_rev_RT                       | ATAAGCTCACATAGATGGGC                                                           |
| <b>Cloning</b>                    |                                                                                |
| 0182_for                          | CATCCTAGGAGGAAAGTTATGACAGTATTTGTAATGC                                          |
| 0182_rev                          | GACCCTAGGTTAACTACTCAATAACTGAAATACAGACAC                                        |
| SarAP1-R                          | GGTACCGATGCATCTTGCTCGATACATTTG                                                 |
| SarAP1-F                          | GTCGACGCGCCGCTGCATGCCTGATATTTTTG                                               |

\*indicates a phosphothioate bond; [Phos] indicates 5' phosphorylation; underlined sequences of index primers indicate barcode sequences
