# Supplementary material for: Staphylococcus aureus Exploits a Non-ribosomal Cyclic Dipeptide to Modulate Survival within Epithelial Cells and Phagocytes
Source: PubMed Central journal article supplement (PMC5025175; doi:10.1371/journal.ppat.1005857), 2016-09-15
Supplement: ppat.1005857.s014.pdf [file ppat.1005857.s014.pdf]

S4 Table: Escape efficiencies of tested *S. aureus* mutants

| Library label | Gene Description                                                | Identifier    | n | % escape <sup>1</sup> | Std Dev |
|---------------|-----------------------------------------------------------------|---------------|---|-----------------------|---------|
| NE4           | ABC transporter ATP-binding protein                             | SAUSA300_0309 | 1 | 90.2                  | -       |
| NE10          | putative hemolysin III                                          | SAUSA300_2129 | 1 | 75.8                  | -       |
| NE12          | drug resistance transporter, EmrB/QacA subfamily                | SAUSA300_2126 | 1 | 84.6                  | -       |
| NE15          | transcriptional regulator, TetR family                          | SAUSA300_2509 | 1 | 89.6                  | -       |
| NE17          | putative drug transporter                                       | SAUSA300_1705 | 1 | 90.4                  | -       |
| NE26          | <i>coa</i> ; staphylocoagulase precursor                        | SAUSA300_0224 | 2 | 116.8                 | 22.1    |
| NE30          | hydrolase, haloacid dehalogenase-like family                    | SAUSA300_0600 | 1 | 81.4                  | -       |
| NE32          | transcriptional regulator, LysR family domain protein           | SAUSA300_0095 | 1 | 104.9                 | -       |
| NE49          | DNA-binding response regulator, AraC family                     | SAUSA300_0217 | 2 | 92.4                  | 16.6    |
| NE67          | <i>isaB</i> ; immunodominant antigen B                          | SAUSA300_2573 | 1 | 106.0                 | -       |
| NE75          | Cap1B; capsular polysaccharide biosynthesis protein Cap1B       | SAUSA300_2597 | 1 | 107.8                 | -       |
| NE91          | <i>kdpA</i> ; K <sup>+</sup> -transporting ATPase, A subunit    | SAUSA300_2034 | 1 | 113.6                 | -       |
| NE95          | <i>agrB</i> ; accessory gene regulator protein B                | SAUSA300_1989 | 3 | 15.8                  | 1.4     |
| NE96          | <i>sarU</i> ; staphylococcal accessory regulator U              | SAUSA300_2438 | 3 | 88.4                  | 18.9    |
| NE99          | transcriptional regulator, Fur family                           | SAUSA300_1448 | 1 | 121.5                 | -       |
| NE100         | FtsK/SpoIIIE family protein                                     | SAUSA300_1482 | 1 | 105.2                 | -       |
| NE104         | putative lipase/esterase                                        | SAUSA300_0641 | 3 | 78.2                  | 29.1    |
| NE110         | transcriptional regulator, GntRfamily/aminotransferase, class I | SAUSA300_0110 | 1 | 102.1                 | -       |
| NE111         | putative surface protein                                        | SAUSA300_0883 | 1 | 110.8                 | -       |
| NE116         | putative sensor histidine kinase                                | SAUSA300_1219 | 1 | 116.6                 | -       |
| NE119         | non-ribosomal peptide synthetase                                | SAUSA300_0181 | 4 | 47.3                  | 12.4    |
| NE129         | DNA internalization-related competence protein ComEC/Rec2       | SAUSA300_1547 | 1 | 100.5                 | -       |
| NE132         | putative transcriptional regulator                              | SAUSA300_2640 | 1 | 110.0                 | -       |
| NE138         | putative membrane protein                                       | SAUSA300_0275 | 1 | 97.0                  | -       |
| NE147         | sensor histidine kinase                                         | SAUSA300_0254 | 1 | 111.7                 | -       |
| NE163         | <i>aur</i> ; zinc metalloproteinase aureolysin                  | SAUSA300_2572 | 2 | 72.6                  | 27.5    |
| NE165         | staphylococcal accessory regulator                              | SAUSA300_0114 | 1 | 86.0                  | -       |
| NE179         | multidrug resistance protein                                    | SAUSA300_2360 | 1 | 92.8                  | -       |
| NE185         | siderophore biosynthesis protein, <i>lucA/lucC</i> family       | SAUSA300_0122 | 1 | 81.2                  | -       |
| NE186         | <i>fnbA</i> ; fibronectin binding protein A                     | SAUSA300_2441 | 1 | 68.6                  | -       |

|       |                                                              |               |   |       |      |
|-------|--------------------------------------------------------------|---------------|---|-------|------|
| NE210 | staphylococcal accessory regulator                           | SAUSA300_2247 | 1 | 81.3  | -    |
| NE212 | putative lysophospholipase                                   | SAUSA300_1710 | 1 | 96.5  | -    |
| NE214 | siderophore biosynthesis protein, lucC family"               | SAUSA300_0123 | 1 | 89.0  | -    |
| NE217 | <i>pknB</i> ; protein kinase                                 | SAUSA300_1113 | 1 | 80.6  | -    |
| NE218 | sensor histidine kinase family protein                       | SAUSA300_0218 | 2 | 100.0 | 12.3 |
| NE251 | polysaccharide biosynthesis protein                          | SAUSA300_0482 | 1 | 83.8  | -    |
| NE258 | <i>cls</i> ; cardiolipin synthetase                          | SAUSA300_2044 | 3 | 85.0  | 35.7 |
| NE262 | DNA-binding response regulator, LuxR family                  | SAUSA300_1220 | 2 | 81.9  | 9.0  |
| NE274 | conserved hypothetical protein                               | SAUSA300_1867 | 1 | 82.3  | -    |
| NE281 | transcriptional regulator, MarR family                       | SAUSA300_2452 | 1 | 69.0  | -    |
| NE286 | immunoglobulin G binding protein A precursor                 | SAUSA300_0113 | 2 | 127.1 | 37.6 |
| NE287 | conserved hypothetical protein                               | SAUSA300_1744 | 2 | 82.0  | 23.9 |
| NE290 | transferrin receptor                                         | SAUSA300_0721 | 2 | 87.6  | 0.9  |
| NE294 | signal transduction protein TRAP                             | SAUSA300_1784 | 3 | 79.1  | 14.1 |
| NE296 | staphylococcal accessory protein X                           | SAUSA300_0654 | 1 | 83.8  | -    |
| NE324 | regulatory protein RecX                                      | SAUSA300_1854 | 2 | 91.9  | 15.5 |
| NE331 | exonuclease RexA                                             | SAUSA300_0870 | 2 | 71.0  | 16.1 |
| NE332 | iron transport associated domain protein                     | SAUSA300_1029 | 2 | 102.1 | 8.6  |
| NE334 | Hyaluronate lyase precursor                                  | SAUSA300_2161 | 1 | 73.7  | -    |
| NE338 | <i>lip</i> , triacylglycerol lipase precursor                | SAUSA300_2603 | 1 | 87.8  | -    |
| NE354 | transcriptional regulator, gntR family protein               | SAUSA300_0503 | 2 | 104.2 | 11.4 |
| NE355 | transcriptional regulator, TetR family                       | SAUSA300_2515 | 1 | 108.3 | -    |
| NE362 | putative teichoic acid biosynthesis protein B                | SAUSA300_0247 | 2 | 100.9 | 11.3 |
| NE367 | arginine repressor                                           | SAUSA300_2571 | 2 | 95.4  | 0.9  |
| NE369 | <i>guaC</i> , guanosine monophosphate reductase              | SAUSA300_1235 | 1 | 105.5 | -    |
| NE374 | <i>feoB</i> , ferrous iron transport protein B               | SAUSA300_2487 | 2 | 119.2 | 22.7 |
| NE383 | Putative membrane protein                                    | SAUSA300_0279 | 2 | 105.5 | 15.7 |
| NE386 | <i>rot</i> , staphylococcal accessory regulator Rot          | SAUSA300_1708 | 2 | 76.5  | 26.4 |
| NE391 | <i>clfB</i> , clumping factor B                              | SAUSA300_2565 | 1 | 106.5 | -    |
| NE392 | peptide ABC transporter, ATP-binding protein                 | SAUSA300_0200 | 2 | 90.1  | 10.0 |
| NE399 | preprotein translocase, SecY protein                         | SAUSA300_2588 | 3 | 100.8 | 27.3 |
| NE400 | iron compound ABC transporter, iron compound-binding protein | SAUSA300_2136 | 3 | 79.8  | 26.0 |
| NE406 | <i>fhuA</i> , errichrome transport ATP-binding protein fhuA  | SAUSA300_0633 | 1 | 112.3 | -    |
| NE410 | <i>ureC</i> , urease, alpha subunit                          | SAUSA300_2240 | 2 | 96.4  | 16.2 |

|       |                                                                        |               |   |       |      |
|-------|------------------------------------------------------------------------|---------------|---|-------|------|
| NE415 | putative transcriptional regulator                                     | SAUSA300_2259 | 4 | 96.5  | 30.1 |
| NE420 | Pbp3, penicillin-binding protein 3                                     | SAUSA300_1512 | 1 | 105.8 | -    |
| NE426 | <i>tatC</i> , Sec-independent protein translocase<br>TatC              | SAUSA300_0347 | 1 | 87.6  | -    |
| NE431 | iron-dependent repressor                                               | SAUSA300_0621 | 4 | 92.7  | 24.6 |
| NE432 | <i>sdrC</i> protein                                                    | SAUSA300_0546 | 2 | 104.2 | 28.3 |
| NE434 | phosphosugar-binding transcriptional regulator                         | SAUSA300_2271 | 2 | 100.6 | 26.9 |
| NE444 | aminopeptidase PepS                                                    | SAUSA300_1860 | 2 | 106.5 | 5.2  |
| NE447 | putative iron-sulfur cluster-binding protein                           | SAUSA300_1806 | 2 | 112.8 | 19.1 |
| NE453 | Sbi, IgG-binding protein SBI                                           | SAUSA300_2364 | 1 | 119.4 | -    |
| NE454 | <i>arcR</i> , transcriptional regulator, Crp/Fnr family                | SAUSA300_2566 | 2 | 105.9 | 28.6 |
| NE457 | Peptide ABC transporter, permease protein                              | SAUSA300_0202 | 2 | 122.7 | 0.3  |
| NE462 | putative membrane protein                                              | SAUSA300_0917 | 2 | 111.5 | 23.4 |
| NE481 | DNA-binding response regulator                                         | SAUSA300_0645 | 2 | 96.9  | 23.6 |
| NE483 | <i>pepT</i> , peptidase T                                              | SAUSA300_0727 | 2 | 102.0 | 28.5 |
| NE505 | transcriptional regulator, LysR family domain protein                  | SAUSA300_0093 | 2 | 108.5 | 11.4 |
| NE512 | <i>modC</i> , molybdenum ABC transporter, ATP-binding protein ModC     | SAUSA300_2228 | 2 | 122.0 | 12.4 |
| NE513 | putative helicase                                                      | SAUSA300_2431 | 2 | 88.0  | 0.2  |
| NE514 | <i>sarT</i> , staphylococcal accessory regulator T                     | SAUSA300_2437 | 4 | 104.8 | 13.9 |
| NE519 | peptidase, M20/M25/M40 family                                          | SAUSA300_1460 | 2 | 95.5  | 11.6 |
| NE528 | putative permease                                                      | SAUSA300_0091 | 2 | 97.7  | 11.8 |
| NE530 | transcriptional regulator, AraC family                                 | SAUSA300_2248 | 2 | 85.7  | 26.7 |
| NE535 | <i>spsA</i> , signal peptidase IA                                      | SAUSA300_0867 | 3 | 48.8  | 11.5 |
| NE539 | <i>fadE</i> , acyl-CoA synthetase FadE                                 | SAUSA300_0228 | 3 | 92.2  | 18.2 |
| NE541 | peptide ABC transporter, permease protein                              | SAUSA300_0201 | 1 | 106.7 | -    |
| NE551 | putative fibronectin/fibrinogen binding protein                        | SAUSA300_1101 | 1 | 108.4 | -    |
| NE554 | <i>vraR</i> , DNA-binding response regulator                           | SAUSA300_1865 | 1 | 100.8 | -    |
| NE557 | iron transport associated domain protein                               | SAUSA300_1030 | 1 | 97.8  | -    |
| NE558 | <i>lukE</i> , leukotoxin Luke                                          | SAUSA300_1769 | 3 | 105.3 | 27.5 |
| NE567 | transcriptional regulator, MarR family                                 | SAUSA300_2331 | 2 | 98.6  | 28.2 |
| NE571 | putative transposase                                                   | SAUSA300_2263 | 1 | 87.0  | -    |
| NE578 | iron compound ABC transporter, permease protein                        | SAUSA300_0599 | 1 | 77.2  | -    |
| NE584 | <i>nark</i> , nitrite extrusion protein                                | SAUSA300_2333 | 2 | 122.7 | 46.6 |
| NE588 | <i>srrB</i> , staphylococcal respiratory response protein, <i>srrB</i> | SAUSA300_1441 | 2 | 88.4  | 42.5 |

|        |                                                          |               |   |       |      |
|--------|----------------------------------------------------------|---------------|---|-------|------|
| NE600  | putative peptidase                                       | SAUSA300_2087 | 2 | 96.9  | 10.0 |
| NE610  | <i>lysP</i> , lysine-specific permease                   | SAUSA300_1628 | 2 | 89.9  | 5.2  |
| NE618  | <i>phoR</i> , sensory box histidine kinase PhoR          | SAUSA300_1638 | 2 | 92.7  | 17.7 |
| NE636  | exfoliative toxin A                                      | SAUSA300_1065 | 1 | 99.6  | -    |
| NE637  | Cbf1, cmp-binding-factor 1                               | SAUSA300_1791 | 2 | 115.0 | 8.7  |
| NE643  | staphylococcal tandem lipoprotein                        | SAUSA300_0102 | 2 | 110.1 | 15.1 |
| NE647  | conserved hypothetical protein                           | SAUSA300_1485 | 1 | 95.8  | -    |
| NE648  | <i>glvC</i> , PTS system, arbutin-like IIBC component    | SAUSA300_2270 | 2 | 73.5  | 2.8  |
| NE672  | homoserine kinase                                        | SAUSA300_1228 | 1 | 113.9 | -    |
| NE679  | Pbp4, penicillin-binding protein 4                       | SAUSA300_0629 | 1 | 100.4 | -    |
| NE773  | drug transporter                                         | SAUSA300_2451 | 1 | 79.3  | -    |
| NE873  | <i>agrC</i> , accessory gene regulator protein C         | SAUSA300_1991 | 3 | 13.2  | 8.8  |
| NE934  | cysteine protease precursor                              | SAUSA300_0950 | 1 | 77.0  | -    |
| NE964  | 4'-phosphopantetheinyl transferase superfamily protein   | SAUSA300_0182 | 4 | 52.4  | 11.7 |
| NE993  | Putative hemolysin III                                   | SAUSA300_2129 | 1 | 86.7  | -    |
| NE1065 | osmoprotectant ABC transporter permease                  | SAUSA300_0707 | 1 | 76.5  | -    |
| NE1077 | <i>rbsK</i> , Ribokinase                                 | SAUSA300_0262 | 3 | 74.7  | 18.1 |
| NE1109 | <i>rpoF</i> , RNA polymerase sigma factor SigB           | SAUSA300_2022 | 3 | 98.3  | 15.0 |
| NE1181 | putative membrane protein                                | SAUSA300_1912 | 1 | 92.6  | -    |
| NE1188 | putative membrane protein                                | SAUSA300_1912 | 3 | 101.9 | 61.5 |
| NE1193 | <i>sarA</i> , accessory regulator A                      | SAUSA300_0605 | 5 | 94.9  | 18.0 |
| NE1224 | Fe/Mn family superoxide dismutase                        | SAUSA300_0135 | 1 | 91.2  | -    |
| NE1234 | <i>lctP</i> , L-lactate permease                         | SAUSA300_0112 | 3 | 86.6  | 30.9 |
| NE1240 | <i>lukD</i> , leukotoxin LukD                            | SAUSA300_1768 | 1 | 101.2 | -    |
| NE1296 | <i>saeS</i> , sensor histidine kinase SaeS               | SAUSA300_0690 | 5 | 66.0  | 9.9  |
| NE1304 | <i>rsp</i> , transcription regulatory protein            | SAUSA300_2326 | 5 | 82.3  | 7.9  |
| NE1354 | Alpha-hemolysin precursor                                | SAUSA300_1058 | 3 | 85.3  | 23.1 |
| NE1363 | <i>srtB</i> , sortase B                                  | SAUSA300_1034 | 1 | 109.6 | -    |
| NE1366 | catalase                                                 | SAUSA300_1232 | 2 | 99.9  | 27.1 |
| NE1386 | <i>lukA</i> , Leukocidin/Hemolysin toxin family protein  | SAUSA300_1974 | 4 | 35.9  | 13.7 |
| NE1399 | <i>hlgA</i> , gamma-hemolysin component A                | SAUSA300_2365 | 1 | 80.4  | -    |
| NE1449 | <i>hlgC</i> , gamma-hemolysin component C                | SAUSA300_2366 | 1 | 89.4  | -    |
| NE1472 | <i>rsbW</i> , anti-sigma-B factor, serine-protein kinase | SAUSA300_2023 | 3 | 25.6  | 9.2  |

|        |                                                        |               |   |       |      |
|--------|--------------------------------------------------------|---------------|---|-------|------|
| NE1532 | <i>agrA</i> , accessory gene regulator protein A       | SAUSA300_1992 | 5 | 6.4   | 4.4  |
| NE1555 | <i>codY</i> , transcriptional repressor CodY           | SAUSA300_1148 | 4 | 92.2  | 12.2 |
| NE1607 | <i>rsbU</i> , sigma-B regulation protein               | SAUSA300_2025 | 3 | 53.3  | 24.8 |
| NE1663 | diacylglycerol glucosyltransferase                     | SAUSA300_0918 | 4 | 93.3  | 12.3 |
| NE1682 | <i>hlgB</i> , gamma-hemolysin component B              | SAUSA300_2367 | 1 | 104.0 | -    |
| NE1714 | GTP pyrophosphokinase                                  | SAUSA300_1590 | 3 | 74.7  | 6.5  |
| NE1756 | sensor histidine kinase                                | SAUSA300_0646 | 1 | 86.5  | -    |
| NE1775 | triacylglycerol lipase                                 | SAUSA300_0320 | 1 | 95.9  | -    |
| NE1787 | <i>srtA</i> , sortase                                  | SAUSA300_2467 | 1 | 112.3 | -    |
| NE1848 | <i>lukS</i> -PV, Pantone-Valentine leukocidin, LukS-PV | SAUSA300_1382 | 3 | 133.8 | 23.9 |
| NE1868 | <i>mecA</i> , penicillin-binding protein 2'            | SAUSA300_0032 | 1 | 106.2 | -    |
| NE1872 | <i>rsbV</i> , anti-sigma-B factor, antagonist          | SAUSA300_2024 | 2 | 102.5 | 68.1 |
| NE1875 | truncated beta-hemolysin                               | SAUSA300_1918 | 2 | 118.3 | 38.1 |
| NE1908 | ABC transporter ATP-binding protein                    | SAUSA300_1911 | 3 | 29.3  | 18.3 |

<sup>1</sup> Normalized to the phagosomal escape rate of the USA300 JE2 wild type detected in the specific experiment. If n >1 then a mean value of all normalized escape rates is shown.
