# Supplementary material for: Staphylococcus aureus Exploits a Non-ribosomal Cyclic Dipeptide to Modulate Survival within Epithelial Cells and Phagocytes
Source: PubMed Central journal article supplement (PMC5025175; doi:10.1371/journal.ppat.1005857), 2016-09-15
Supplement: ppat.1005857.s015.pdf [file ppat.1005857.s015.pdf]

S5 Table: *S. aureus* transposon mutants that were significantly depleted or enriched in a murine pneumonia model

| locus       | log2 FC | p-val. | adj. p-val. | product                                                      | gene         |
|-------------|---------|--------|-------------|--------------------------------------------------------------|--------------|
| RSAU_000335 | -4.89   | 0.000  | 0.000       | bifunctional GMP synthase/glutamine amidotransferase protein | <i>guaA</i>  |
| RSAU_002354 | -3.99   | 0.004  | 0.090       | hypothetical protein                                         |              |
| RSAU_000347 | -3.97   | 0.004  | 0.090       | hypothetical protein                                         |              |
| RSAU_000919 | -3.97   | 0.004  | 0.090       | hypothetical protein                                         |              |
| RSAU_001762 | -3.82   | 0.000  | 0.011       | type 1 glutamine amidotransferase (GATase1)-like protein     |              |
| RSAU_000524 | -3.76   | 0.010  | 0.093       | hexulose-6-phosphate synthase, putative                      | <i>hps</i>   |
| RSAU_002139 | -3.69   | 0.005  | 0.090       | hypothetical protein                                         |              |
| RSAU_002284 | -3.66   | 0.004  | 0.090       | major facilitator superfamily drug transporter, putative     |              |
| RSAU_000898 | -3.58   | 0.006  | 0.090       | hypothetical protein                                         |              |
| RSAU_002181 | -3.48   | 0.000  | 0.011       | CorA-like Mg2 transporter protein                            |              |
| RSAU_000034 | -3.37   | 0.007  | 0.090       | putative transposase                                         |              |
| RSAU_001071 | -3.12   | 0.010  | 0.093       | YlmG membrane protein                                        | <i>ylmG</i>  |
| RSAU_002127 | -3.12   | 0.008  | 0.090       | urease accessory protein UreD, putative                      | <i>ureD</i>  |
| RSAU_000072 | -2.77   | 0.009  | 0.093       | lucC family siderophore biosynthesis protein                 | <i>sbnC</i>  |
| RSAU_000130 | -2.15   | 0.008  | 0.090       | non-ribosomal peptide synthetase, putative                   | <i>ausA</i>  |
| RSAU_003007 | -2.05   | 0.010  | 0.093       | <i>ssr42</i>                                                 | <i>ssr42</i> |
| RSAU_000802 | 3.30    | 0.007  | 0.090       | 5'-nucleotidase, putative                                    |              |
| RSAU_001966 | 3.53    | 0.008  | 0.090       | DNA-directed RNA polymerase, delta subunit                   | <i>rpoE</i>  |
| RSAU_000703 | 4.10    | 0.007  | 0.090       | 7-cyano-7-deazaguanine reductase                             | <i>queF</i>  |
