# Supplementary material for: Staphylococcus aureus Exploits a Non-ribosomal Cyclic Dipeptide to Modulate Survival within Epithelial Cells and Phagocytes
Source: PubMed Central journal article supplement (PMC5025175; doi:10.1371/journal.ppat.1005857), 2016-09-15
Supplement: ppat.1005857.s016.pdf [file ppat.1005857.s016.pdf]

S6 Table: Clinical score determination of mice to assess severity of disease

| Observation                                                                       |                                                                                                                                     | Score points         |
|-----------------------------------------------------------------------------------|-------------------------------------------------------------------------------------------------------------------------------------|----------------------|
| <b>I Body weight</b>                                                              |                                                                                                                                     |                      |
| - No change                                                                       |                                                                                                                                     | 0                    |
| - Loss of body weight in % = score points; e.g. loss of body weight 8% = 8 points |                                                                                                                                     | 1-20                 |
| - Loss of body weight $\geq 20\%$                                                 |                                                                                                                                     | 20                   |
| <b>II General conditions</b>                                                      |                                                                                                                                     |                      |
| <b>Fur</b>                                                                        |                                                                                                                                     |                      |
| - Shining                                                                         |                                                                                                                                     | 0                    |
| - Matte                                                                           |                                                                                                                                     | 2                    |
| - Ruffled                                                                         |                                                                                                                                     | 4                    |
| <b>Eyes</b>                                                                       |                                                                                                                                     |                      |
| - Clear and clean                                                                 |                                                                                                                                     | 0                    |
| - Unclean and sticky, closed or semi-closed                                       |                                                                                                                                     | 3                    |
| <b>Posture</b>                                                                    |                                                                                                                                     |                      |
| - Normal                                                                          |                                                                                                                                     | 0                    |
| - Hunched                                                                         |                                                                                                                                     | 10                   |
| - Massively hunched                                                               |                                                                                                                                     | 20                   |
| <b>Clinical complications</b>                                                     |                                                                                                                                     |                      |
| - Tension, paralysis, tremor                                                      |                                                                                                                                     | 20                   |
| - Breath noises                                                                   |                                                                                                                                     | 20                   |
| - Animal feels cold to the touch                                                  |                                                                                                                                     | 20                   |
| <b>III Motility</b>                                                               |                                                                                                                                     |                      |
| - Spontaneous (normal behavior, social contacts)                                  |                                                                                                                                     | 0                    |
| - Spontaneous but reduced                                                         |                                                                                                                                     | 1                    |
| - Moderately reduced activity                                                     |                                                                                                                                     | 2                    |
| - Motility only after stimulation                                                 |                                                                                                                                     | 5                    |
| - Isolation, lethargy, coordination disorders                                     |                                                                                                                                     | 10                   |
| - Self-mutilation, aggression                                                     |                                                                                                                                     | 20                   |
| <b>IV Respiration</b>                                                             |                                                                                                                                     |                      |
| - Breathing normal                                                                |                                                                                                                                     | 0                    |
| - Breathing slightly changed                                                      |                                                                                                                                     | 1                    |
| - Accelerated breathing + 30% (tachypnoea)                                        |                                                                                                                                     | 10                   |
| - Strongly accelerated breathing + 50%                                            |                                                                                                                                     | 20                   |
|                                                                                   |                                                                                                                                     |                      |
| <b>Rating</b>                                                                     | <b>measures</b>                                                                                                                     | <b>Sum score pts</b> |
| Severity level 0                                                                  | no burden on animals, animals healthy                                                                                               | 0-3                  |
| Severity level 1                                                                  | low burden on animals, low sickness, animals are observed                                                                           | 4-9                  |
| Severity level 2                                                                  | moderate burden on animals, moderate sickness, animals are carefully observed                                                       | 10-15                |
| Severity level 3                                                                  | moderate to severe burden on animals, moderate to severe sickness, animals are carefully observed, abort of experiment if necessary | 16-20                |
| Severity level 4                                                                  | severe burden on animals, animals moribund, implementation of humane endpoint, abort of experiment                                  | >20                  |
